# Supplementary material
Source: PubMed Central journal article supplement (PMC5685664)

### Age 0–4 years

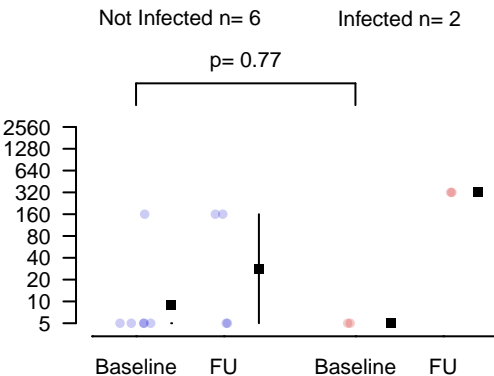

### Age 5–8 years

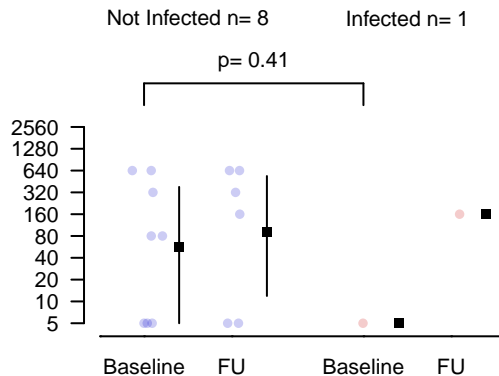

### Age 9–14 years

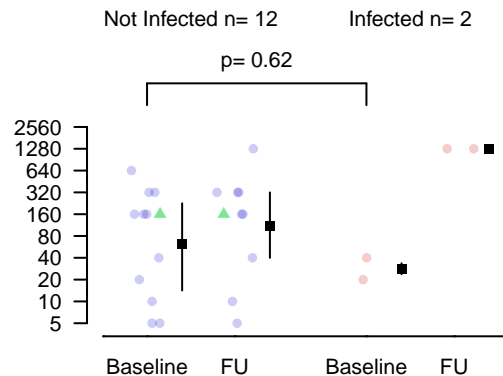

### Age 15–34 years

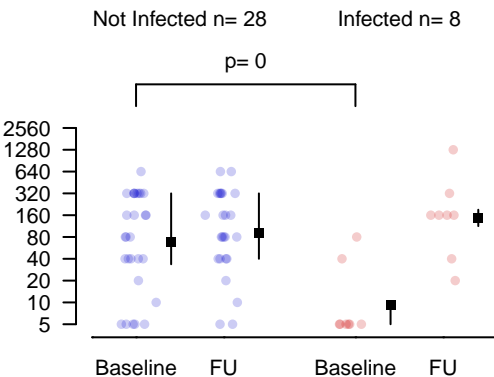

### Age 35–49 years

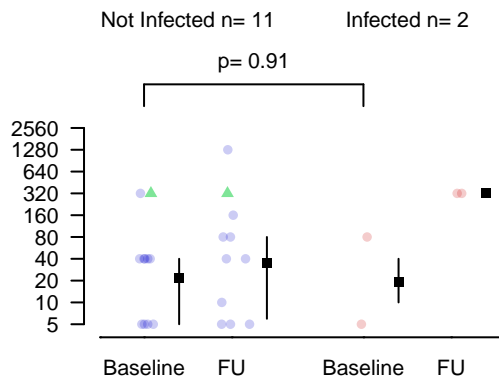

### Age 50–100 years

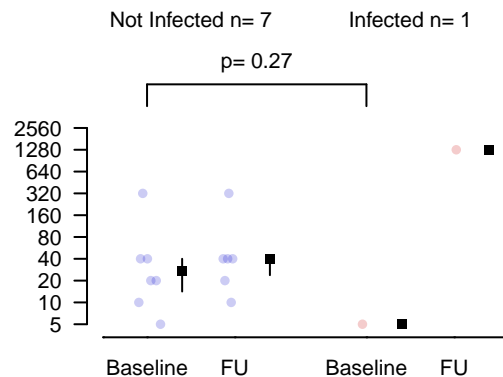

Supplement: NIHMS908414-supplement-3.pdf [file NIHMS908414-supplement-3.pdf]

### Age 0–4 years

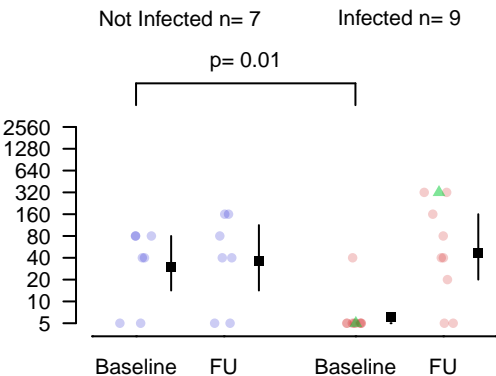

### Age 5–8 years

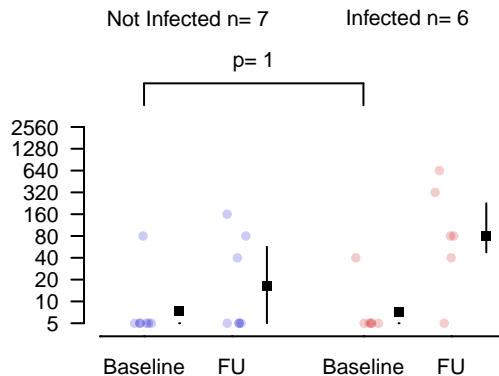

### Age 9–14 years

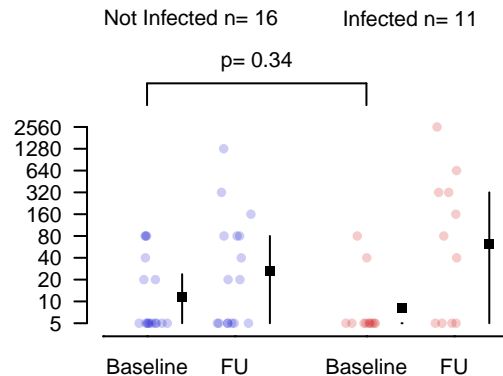

### Age 15–34 years

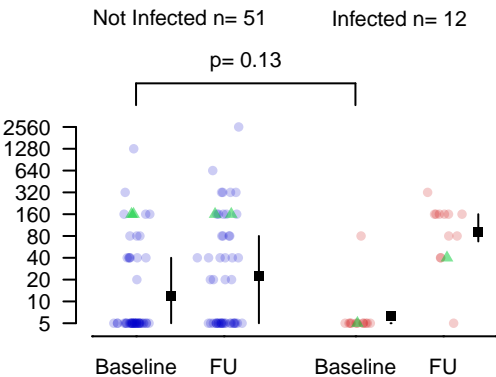

### Age 35–49 years

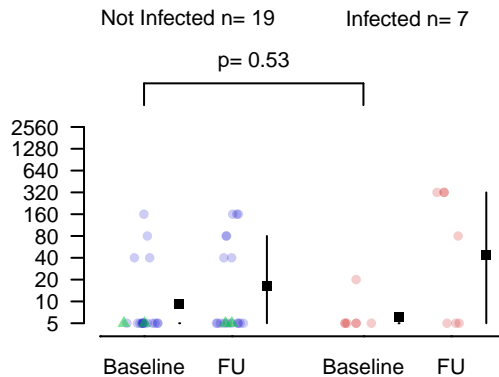

### Age 50–100 years

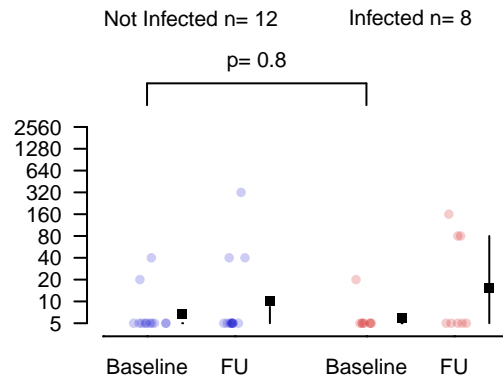

Supplement: NIHMS908414-supplement-4.pdf [file NIHMS908414-supplement-4.pdf]

0–14 years old 2013 season

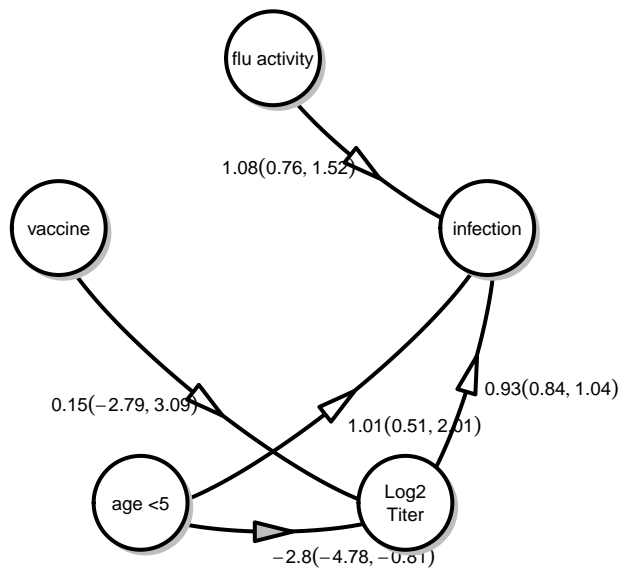

15–49 years old 2013 season

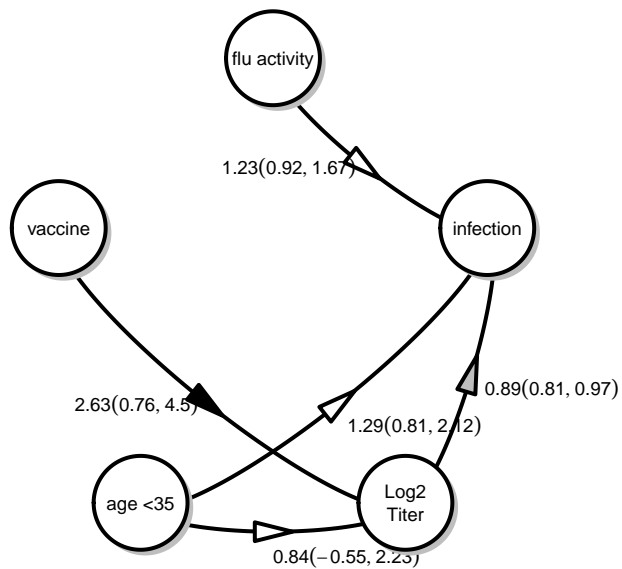

50–85 years old 2013 season

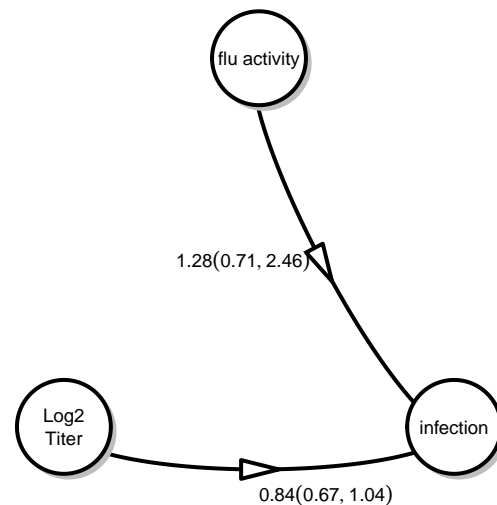

Supplement: NIHMS908414-supplement-5.pdf [file NIHMS908414-supplement-5.pdf]

0–14 years old 2015 season

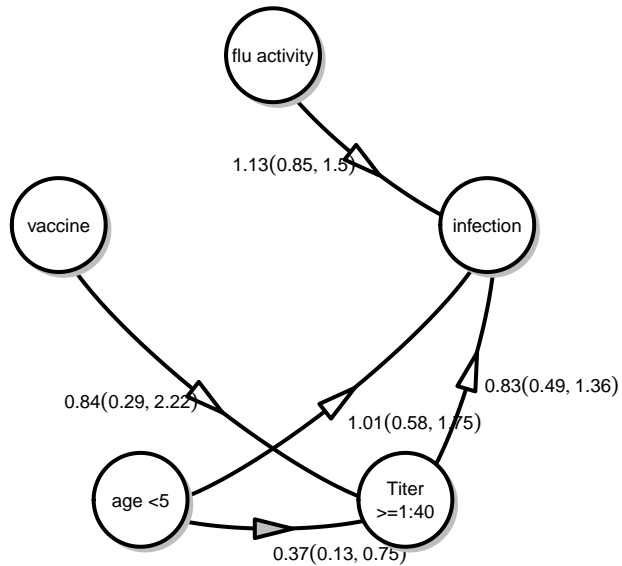

15–49 years old 2013 season

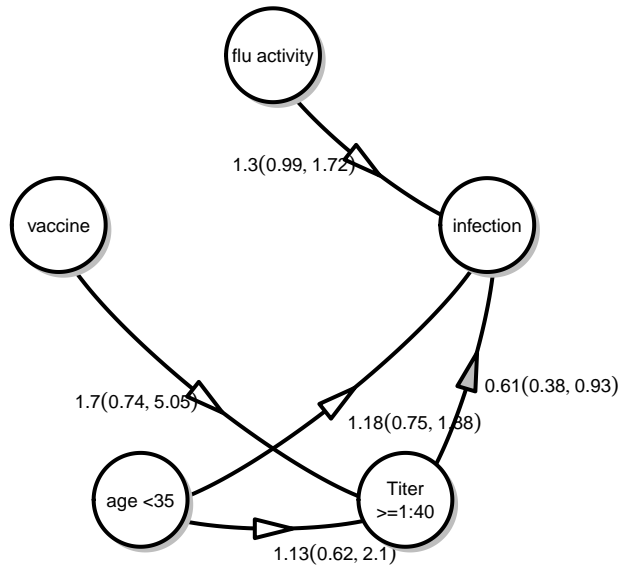

50–85 years old 2015 season

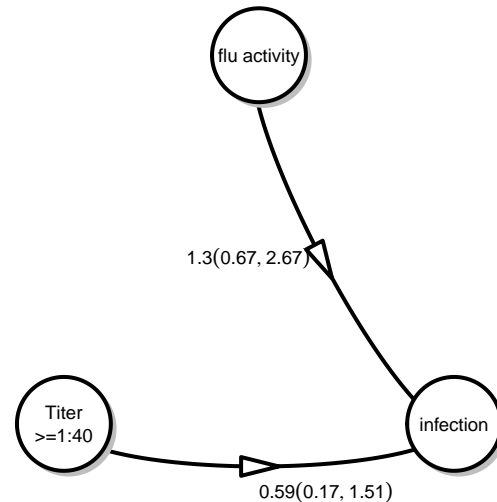

Supplement: NIHMS908414-supplement-6.pdf [file NIHMS908414-supplement-6.pdf]

0–14 years old 2015 season

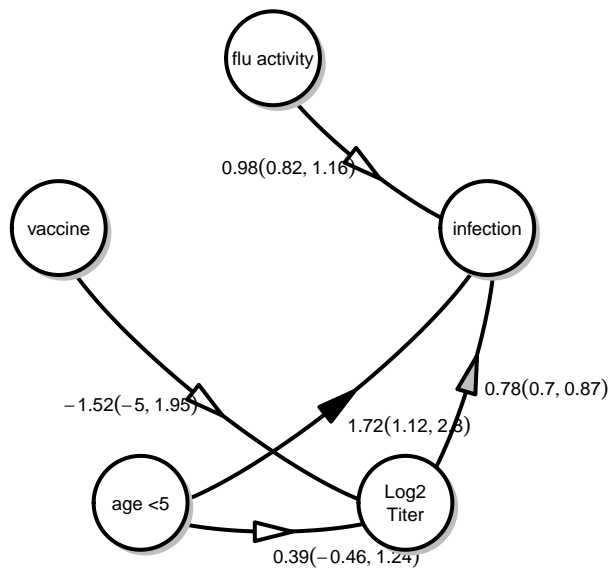

15–49 years old 2015 season

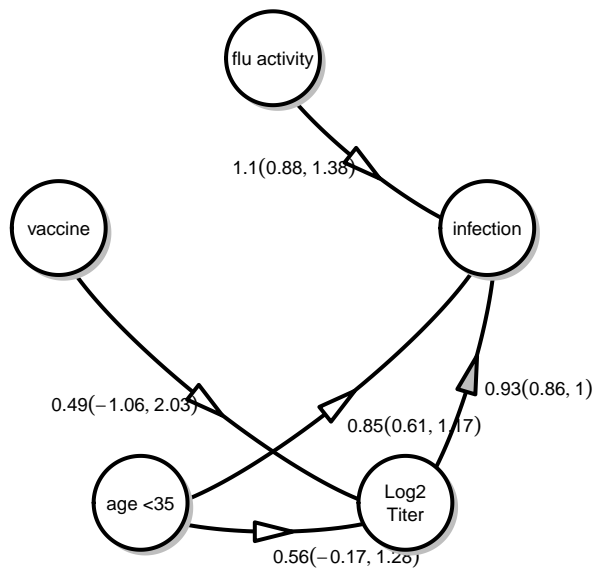

50–85 years old 2015 season

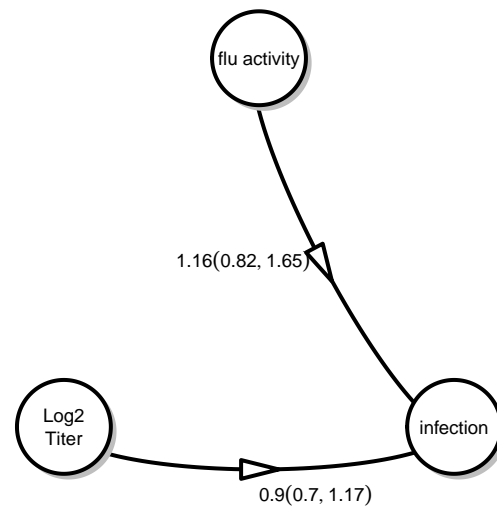

Supplement: NIHMS908414-supplement-7.pdf [file NIHMS908414-supplement-7.pdf]

0–14 years old 2015 season

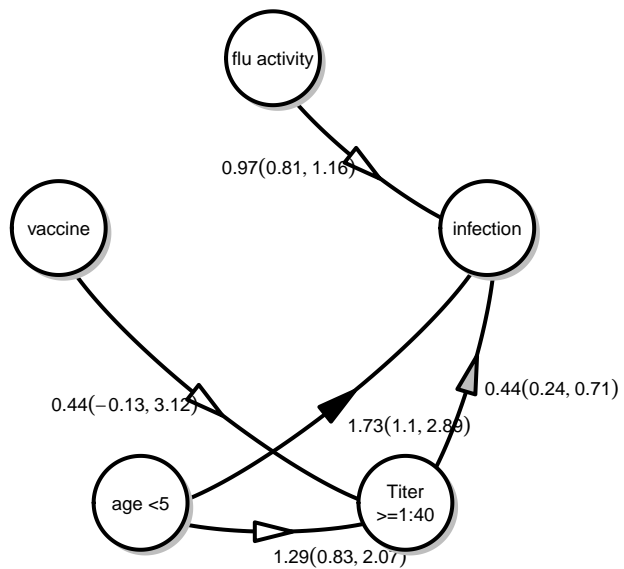

15–49 years old 2015 season

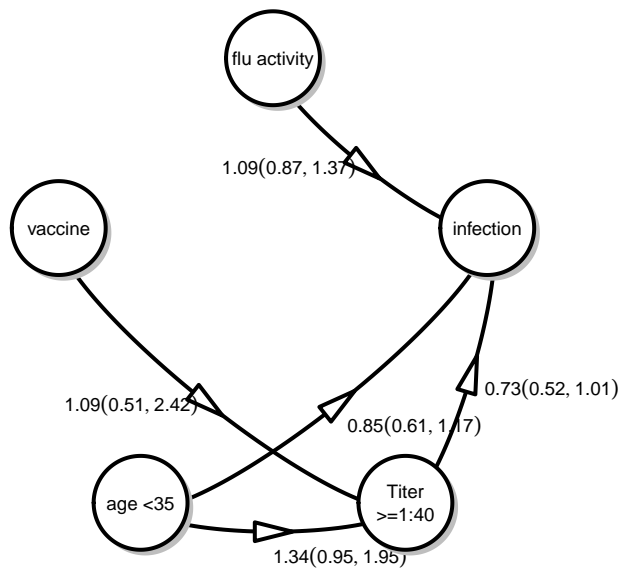

50–85 years old 2015 season

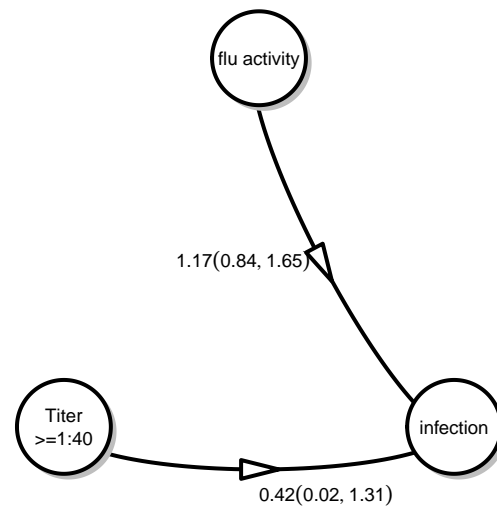

Supplement: NIHMS908414-supplement-8.pdf [file NIHMS908414-supplement-8.pdf]
